# Supplementary material for: Study of the influence of the metal complex on the cytotoxic activity of titanocene-functionalized mesoporous materials
Source: Royal Society of Chemistry journal article supplement (doi:10.1039/b919269g), 2009-11-30
Supplement: b919269g.pdf [file b919269g.pdf]

## Supporting information

### Study of the influence of the metal complex on the cytotoxic activity of titanocene-functionalized mesoporous materials.

Goran N. Kaluderović,<sup>\*a,b</sup> Damián Pérez-Quintanilla,<sup>c</sup> Isabel Sierra,<sup>c</sup> Sanjiv Prashar,<sup>c</sup> Isabel del Hierro,<sup>c</sup> Željko Žižak,<sup>d</sup> Zorica D. Juranić,<sup>d</sup> Mariano Fajardo<sup>c</sup> and Santiago Gómez-Ruiz<sup>\*c</sup>

<sup>a</sup> Institut für Chemie, Martin-Luther-Universität Halle-Wittenberg, Kurt-Mothes-Straße 2, D-06120 Halle, Germany; E-mail: [goran.kaluderovic@chemie.uni-halle.de](mailto:goran.kaluderovic@chemie.uni-halle.de)

<sup>b</sup> Department of Chemistry, Institute of Chemistry, Technology and Metallurgy, University of Belgrade, Studentski trg 14, 11000 Belgrade, Serbia; E-mail: [goran@chem.bg.ac.rs](mailto:goran@chem.bg.ac.rs)

<sup>c</sup> Departamento de Química Inorgánica y Analítica, E.S.C.E.T., Universidad Rey Juan Carlos, 28933 Móstoles, Madrid, Spain; Fax: 34 914888143; Tel: 34 914888527; E-mail: [santiago.gomez@urjc.es](mailto:santiago.gomez@urjc.es)

<sup>d</sup> Institute of Oncology and Radiology of Serbia, 11000 Belgrade, Serbia

#### This supporting information contains:

1. Solid-state <sup>29</sup>Si NMR spectra of all the studied surfaces
2. Pore distribution for all the studied materials

#### 1. Solid-state <sup>29</sup>Si NMR spectra of all the studied surfaces

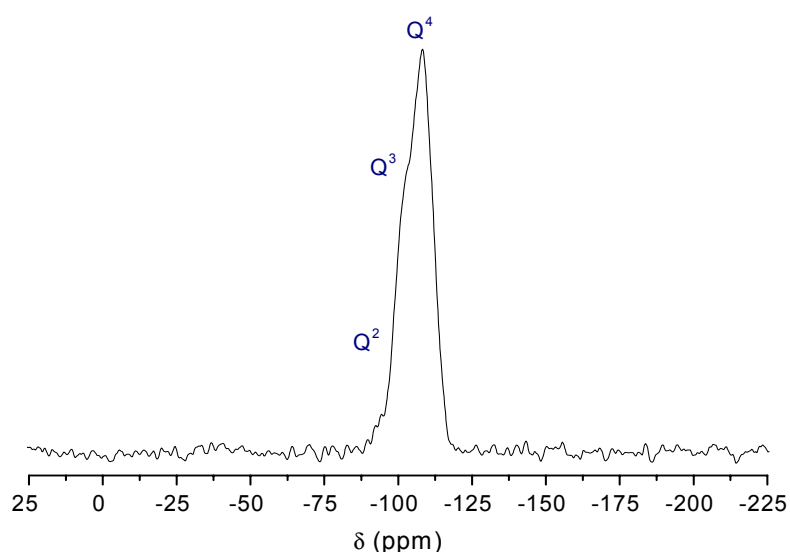

Figure 1. Solid-state <sup>29</sup>Si NMR spectra of non-functionalized MCM-41

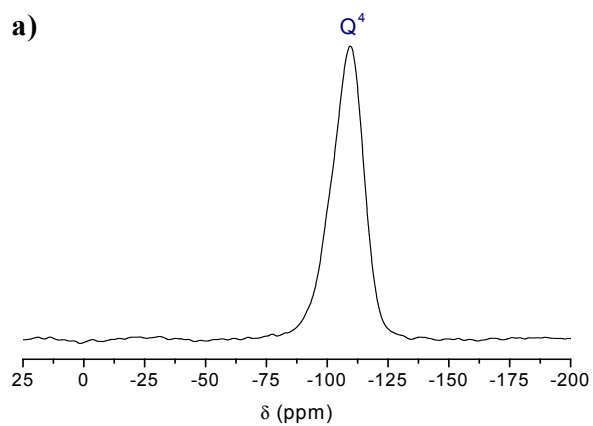

Figure 2. Solid-state  $^{29}\text{Si}$  NMR spectra of **S1**

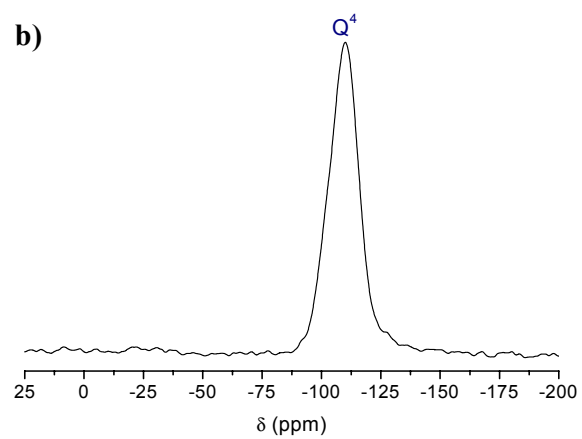

Figure 3. Solid-state  $^{29}\text{Si}$  NMR spectra of **S2**

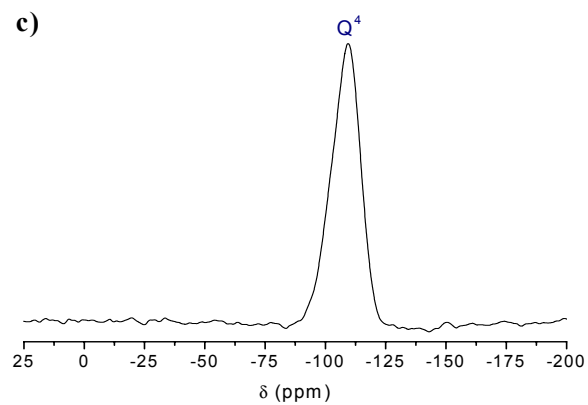

Figure 4. Solid-state  $^{29}\text{Si}$  NMR spectra of **S3**

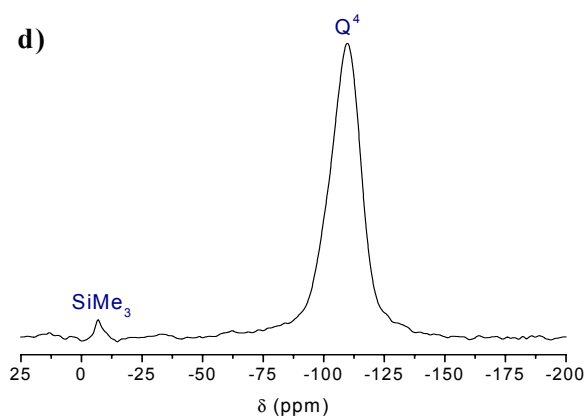

Figure 5. Solid-state <sup>29</sup>Si NMR spectra of S4

## 2. Pore distribution for all the studied materials

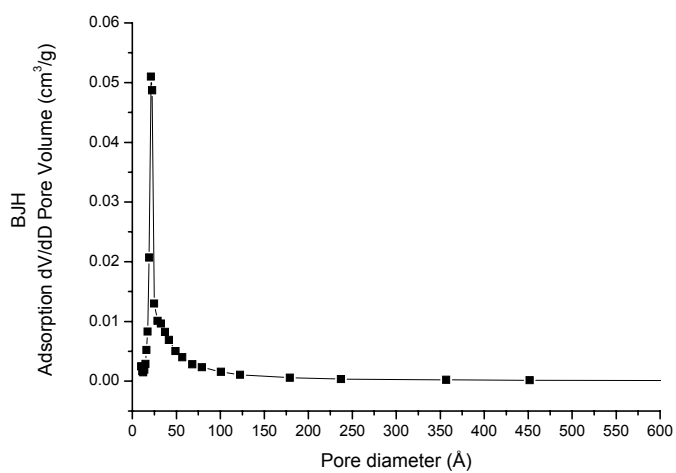

Figure 6. Pore size distribution for MCM-41.

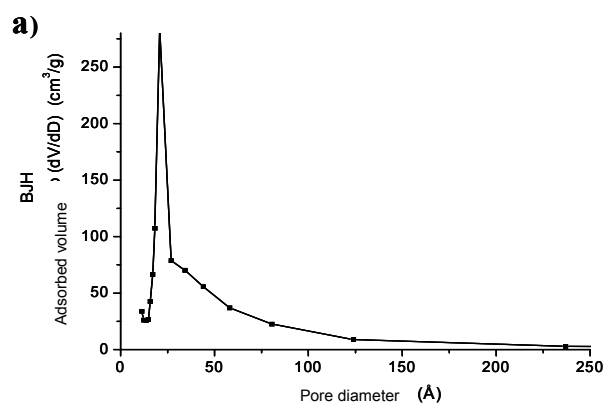

Figure 7. Pore size distribution for S1.

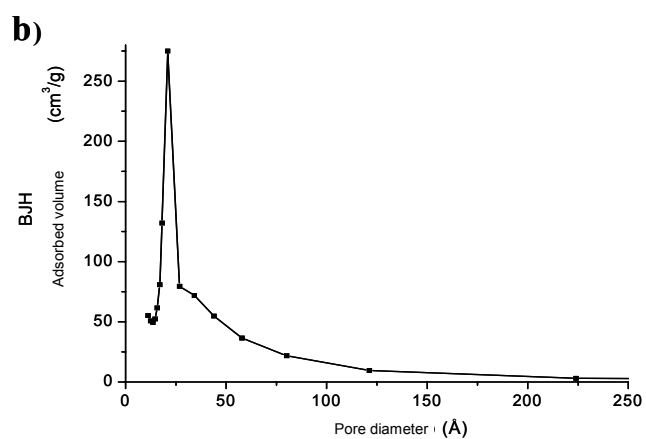

Figure 8. Pore size distribution for S2.

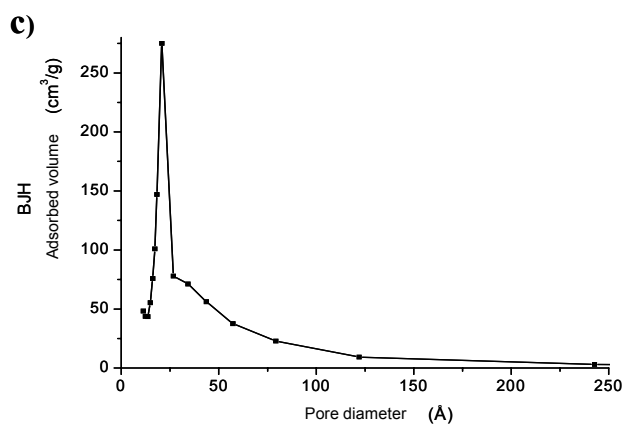

Figure 9. Pore size distribution for S3.

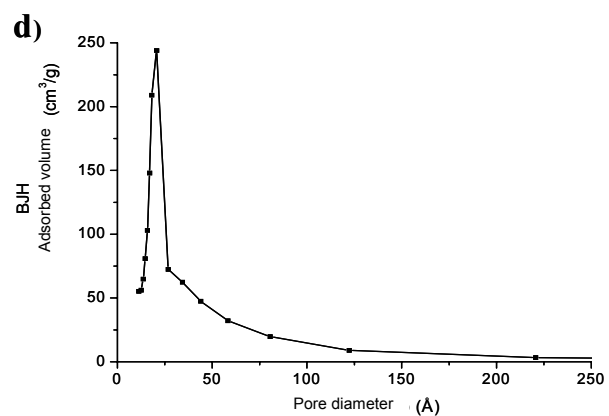

Figure 10. Pore size distribution for **S4**.
